1 **Chance and pleiotropy dominate genetic diversity**  
2 **in complex bacterial environments**

3

4 **Lianet Noda-Garcia<sup>1</sup>, Dan Davidi<sup>2</sup>, Elisa Korenblum<sup>2</sup>, Assaf Elazar<sup>1</sup>,**  
5 **Ekaterina Putintseva<sup>3</sup>, Asaph Aharoni<sup>2</sup> & Dan S. Tawfik<sup>1,\*</sup>**

6 <sup>1</sup>Department of Biomolecular Sciences, Weizmann Institute of Science, Rehovot  
7 76100, Israel.

8 <sup>2</sup>Department of Plant and Environmental Sciences, Weizmann Institute of  
9 Science, Rehovot 76100, Israel.

10 <sup>3</sup>Institutes of Science and Technology, Klosterneuburg, Austria.

11

12 \* Corresponding author; e-mail: dan.tawfik@weizmann.ac.il.

13

14

15

16

17 **Abstract**

18 How does environmental complexity affect the evolution of single genes? Here,  
19 we measured the effects of a set of mutants of *Bacillus subtilis* glutamate  
20 dehydrogenase across 19 different environments – from homogenous single cell  
21 populations in liquid media to heterogeneous biofilms, plant roots and soil  
22 communities. The effects of individual gene mutations on organismal fitness  
23 were highly reproducible in liquid cultures. Strikingly, however, 84% of the  
24 tested alleles showed opposing fitness effects under different **growth conditions**  
25 **(environmental pleiotropy)**. In biofilms and soil samples, different alleles  
26 dominated in parallel replica experiments. Accordingly, we found that in these  
27 **heterogeneous cell communities** the fate of mutations was dictated by a  
28 combination of selection and drift. The latter **relates to** programmed prophage  
29 excisions that occurred along biofilm development. Overall, per individual  
30 condition, by the combined action of selection, pleiotropy and chance, a wide  
31 range of glutamate dehydrogenase mutations persisted and sometimes fixated.  
32 However, across longer periods and multiple environments, nearly all this  
33 diversity would be lost – indeed, considering all environments and conditions we  
34 have tested, wild-type is the fittest allele.

35

36

37

38 The function of most genes may be essential in some conditions, but only  
39 marginally contributing or even deleterious in other conditions <sup>1-4</sup>. The effects of  
40 mutations on organismal fitness are therefore environment-dependent, giving  
41 rise to complex, pleiotropic genotype-by-environment interactions <sup>5,6</sup>. (Here, we  
42 refer to different effects of the same mutation as ‘environmental pleiotropy’ <sup>7</sup>, or  
43 ‘pleiotropy’ for brevity, and opposing effects in different environments as  
44 ‘antagonistic pleiotropy’). Moreover, bacterial populations often do not comprise  
45 single cells, but rather have a structure as in biofilms. Under this complexity:  
46 changing environments and heterogeneous communities (cell or/and species  
47 wise), the fate of mutations could also be dictated by population bottlenecks  
48 (drift) or rapid takeover of beneficial mutations in other genes (selective  
49 sweeps) <sup>8-10</sup>. Consequently, the frequency of a given gene allele may change  
50 dramatically (from perishing to fixation) with no relation to its protein function  
51 <sup>11,12</sup>.

52 We aimed at an experimental setup that would examine how complex  
53 bacterial growth states and environments might shape protein evolution.  
54 Previous systematic mappings were based on a direct linkage between protein  
55 stability and function and organismal survival, thus enabling measurements of  
56 effects of mutations at the protein level <sup>5,13-16</sup>. However, how mutations in a  
57 single gene-protein affect organismal fitness under varying environments and  
58 conditions is largely unexplored <sup>17</sup>. We thus chose as our model *Bacillus subtilis*  
59 NCIB 3610, a non-domesticated strain capable of growing in diverse aquatic and  
60 terrestrial environments <sup>18</sup>. We explored the effects of mutations in different  
61 conditions: in dispersed cells in liquid, but also in biofilms where phenotypic and  
62 genetic variability prevails <sup>12</sup>. We also mapped the effects of mutations during

63 spore formation and germination <sup>19</sup> and in more complex and close to natural  
64 environments including soil, rhizosphere and plant roots.

65 A catabolic glutamate dehydrogenase (GDH) was our model protein. This  
66 enzyme is essential when amino acids such as proline serve as sole carbon-  
67 nitrogen sources <sup>20</sup>. However, in the presence of ammonia and glycolytic sugars,  
68 GDH activity is redundant as glutamate must be synthesized rather than  
69 catabolized. GDHs therefore respond to changes in carbon-nitrogen sources, and  
70 as regulators of glutamate homeostasis, are also associated with biofilm  
71 development <sup>21,22</sup>. *B. subtilis* has two catabolic GDHs, RocG and GudB. The latter  
72 is constitutively expressed, and is regulated via association of its hexameric form  
73 <sup>23</sup>. GudB has also regulatory roles <sup>24,25</sup> via interactions with the transcriptional  
74 activator of glutamate synthase <sup>25</sup> and **with a** transcription termination factor  
75 that modulates the stringent response <sup>26</sup>. We explored mutations in the  
76 oligomeric interface of GudB, aiming at multilateral effects on GudB's enzymatic  
77 and regulatory functions.

78 Altogether, these choices of organism and enzyme allowed us to readily  
79 examine and quantify the fate of GudB alleles in a range of different growth  
80 conditions and environments, also mimicking natural habitats where strong  
81 evolutionary forces act <sup>12</sup>.

82

### 83 **Experimental setup and data processing**

84 We anticipated that the effects of the explored mutations would be complex and  
85 condition-dependent. We thus opted for **deep** rather than broad coverage and  
86 mapped 10 positions within a single ~150 base pairs segment that resides at  
87 GudB's oligomeric interface. **The mutagenized positions were arbitrarily chosen**

88 while aiming to map highly conserved positions (*e.g.* 58, D in all GudB  
89 orthologues) as well as diverged ones (*e.g.* 48, or 61; variable amongst GudB  
90 orthologues; **Table S1**). The mutagenized codons were diversified to NNS,  
91 whereby N represents any of the 4 bases, and S represents G or C. We thus  
92 created 10 libraries, each diversifying a single position into 20 different amino  
93 acids *plus* a stop-codon. The libraries were incorporated into the chromosome of  
94 *B. subtilis* NCIB 3610 under *gudB*'s original promoter and terminator. The  
95 combined library contained 320 single mutant alleles, whose genomes differ, in  
96 principle, by a single GudB mutation, including 200 different amino acid alleles  
97 (including wild-type), 10 stop-codons, and also synonymous alleles whereby the  
98 same amino acid could be encoded by 2 or 3 different codons.

99 This starting library (the initial mix, hereafter) was used to inoculate  
100 cultures grown in an array of different conditions. We tested 7 different growth  
101 states *with diverse* complexity, from single cells to communities: liquid, pellicles  
102 (air-liquid biofilms), spores, germinated spores, biofilms grown on agar  
103 including on carbon-nitrogen gradients, and *colonized* soil. Up to 5 different  
104 carbon-nitrogen sources were used that, at least as far as the phenotypes of the  
105 GudB knockout indicate, inflict different levels of selection on GudB: Glutamate  
106 *plus* ammonia (GA) where  $\Delta$ GudB has no growth effect; glutamate *plus* glycerol  
107 (GG), arginine (A), and arginine *plus* proline (PA), where  $\Delta$ GudB exhibits a slight  
108 growth defect, and proline (P) where  $\Delta$ GudB exhibits the strongest growth defect  
109 (**Fig. S1**). In total, we tested 19 conditions. At each condition, three to five  
110 biological replicas were performed by inoculating from the same initial mix. The  
111 replicas were grown in parallel, and individually analyzed. Illumina sequencing  
112 was applied to determine the frequency of each of the *gudB* alleles in the initial

113 mix and after growth. Following filtering (see Methods), we obtained data for  
114 244 up to 269 individual alleles per experiment (**Data S1 & Fig. S2**).

115 The ratio between an allele's frequency at the end of growth and in the  
116 initial mix was derived, and this ratio is referred to as the frequency coefficient  
117 (FC; **Data S2**). Basically, FC > 1 means an enriched, beneficial mutation, and FC <  
118 1 a purged deleterious one. However, given the experimental error in  
119 determining FC values, values between 0.8 and 1.2 were classified as 'neutral', FC  
120 ≤0.8 assigned a mutation as 'deleterious', and FC >1.2 as 'beneficial' (see  
121 Methods). Mutations with FC ≤0.1 were classified as 'highly deleterious', and  
122 similarly, FC ≥10 as 'highly beneficial'. FC values reflect the relative frequency of  
123 alleles, and therefore relate logarithmically to their relative fitness effects (or  
124 selection coefficient, *s*). Hence, logFC values were compared throughout. Note,  
125 however, that the number of generations differs fundamentally between  
126 conditions – e.g. ~50 generations in liquid (following 5 serial transfers into a  
127 fresh culture) versus effectively no replication in spores (a dormant non-  
128 replicative form of *B. subtilis*). Moreover, in pellicles and biofilms, the number of  
129 generations cannot be easily determined, and in biofilms different cell types (i.e.  
130 matrix producers, dormant cells, etc.) have different growth rates<sup>27,28</sup>. So, while  
131 we could not calculate selection coefficients, one should keep in mind that an FC  
132 value of 0.8 in spores would effectively mean extinction across 50 generations in  
133 liquid ( $0.8^{50} = 10^{-5}$ ).

134

### 135 **Irreproducibility – selection versus drift**

136 Our first observations indicated two contrasting scenarios. In liquid cultures, for  
137 example, we observed highly reproducible FC values between biological replicas

138 **(Fig. 1a)**. Given the small sample numbers (3 replicas **as standard**, 5 in few  
139 cases) the observed variance may underestimate the actual variance. However,  
140 the repetitively low variance in a range of different liquid conditions, and in  
141 other replica measurements in liquid <sup>29</sup>, support high reproducibility. In biofilms,  
142 however, despite the fact that we did not bottleneck any population upon  
143 inoculum, the **poor** correlation between replicas was **evident (Fig. 1b)**. The  
144 reproducibility between biological replicas indicates selection, **suggesting that in**  
145 **reproducible conditions, the fitness of *GudB*'s and of *B. subtilis* are tightly**  
146 **coupled**. In biofilms however, the lack of reproducibility **suggested** the  
147 dominance of drift, *i.e.*, random sampling of *GudB* alleles.

148 To quantify the contribution of selection versus drift in different  
149 conditions, we used two criteria. Firstly, we compared the variability in FC  
150 values between replicas by calculating the standard deviation (SD) per allele  
151 (using, by default, the logarithm of the FC values; see Methods). The average SD  
152 value for all alleles in each experiment ( $\overline{SD}$ ) is given for **the different growth**  
153 **states (a growth state, *e.g.* liquid, may include several conditions, *e.g.* different**  
154 **carbon-nitrogen sources; Fig. 1c; Fig. S3a & Table S2)**. As can be seen, in liquid,  
155 pellicles and spores, the  $\overline{SD}$  values between biological replicas were low (< 0.06).  
156 In biofilms and bulk soil, however, the  $\overline{SD}$  values were > 0.25 indicating low  
157 reproducibility. **The Fisher test also indicated that for all tested alleles, the**  
158 **variance between FC values significantly changed between liquid, pellicles and**  
159 **spores when compared to germinated spores, biofilms and bulk soil (p values in**  
160 **the range of 0.048 to  $1.18 \times 10^{-27}$ ; Data S2).**

161 Secondly, if drift dictates the fate of *GudB* alleles, codons of the same  
162 amino acid should exhibit very different FC values. The deviations between

163 synonymous codon alleles of the same amino acid were calculated, averaged for  
164 all alleles in the same experiment, and then for all replicas of the same  
165 experiment ( $\overline{SD}_{\text{syn}}$ , in log values; **Fig. 1d**; **Fig. S3b** & **Table S3**). The Levene's  
166 test confirmed that the variance between synonymous codons is significantly  
167 different across conditions (p values in the range of 0.01 to  $10^{-24}$ ; **Table S4**).  
168 Note that the  $\overline{SD}_{\text{syn}}$  criterion holds within individual replica experiments and is  
169 thus independent of the comparison of  $\overline{SD}$  between biological replicas.  
170 Nonetheless, these criteria are clearly correlated (**Fig. 1c & d**). Overall, it appears  
171 that in liquid, pellicles and spores, the FC values report the outcome of selection  
172 acting on GudB alleles at the amino acid level as expected (in few alleles,  
173 selection also acted reproducibly at the codon level, **Fig. S4**). In contrast, in  
174 biofilms and bulk soil we consistently observed higher  $\overline{SD}$  as well as higher  
175  $\overline{SD}_{\text{syn}}$  values. In some biofilm experiments, in effect, a single codon had taken  
176 over resulting in  $\overline{SD}_{\text{syn}}$  values  $\geq 3$  (note that logFC values were compared  
177 throughout, and the SD for FC values is therefore  $\geq 10^3$ ).

178         Given that some conditions were selection-dominated and others were  
179 subject to chance, we divided our analysis in two. Firstly, we analyzed selection  
180 dominated conditions (liquid, pellicles and spores) to examine whether and how  
181 GudB mutations exert different fitness effects under different environments.  
182 Secondly, conditions where drift prevailed (germination, biofilms and soil  
183 colonization) were analyzed to reveal the relative contributions of selection  
184 versus chance.

185

186 **Pleiotropy - fitness-effects of mutations are condition-dependent**



187 While the FC values, and hence the fitness effects of mutations, were  
188 reproducible under many conditions, their distribution varied widely between  
189 conditions, including between carbon-nitrogen sources (**Fig. S5**). This indicates  
190 pleiotropy – individual GudB alleles have different fitness effects in different  
191 **environments**. To quantify the level of pleiotropy, we compared the FC values of  
192 the same GudB mutation across the 9 individual selection-dominated conditions.  
193 Because the number of generations differs from one condition to another, we  
194 focused on shift from beneficial to deleterious, and vice versa (sign, or  
195 antagonistic pleiotropy) **because** the sign indicates **the overall trend** irrespective  
196 of generation numbers. Representative dot plots comparing the FC values across  
197 3 different liquid conditions are shown (**Fig. 2a**). These indicate that pleiotropy  
198 is common, even when comparing liquid cultures with overlapping carbon-  
199 nitrogen sources. In particular, a significant number of GudB mutations show  
200 antagonistic pleiotropy (dashed squares, **Fig. 2a**). Indeed, the Pearson  
201 correlation values for the 36 possible pair-wise comparisons of **the 9**  
202 **reproducible** conditions were **all** below 0.7, **and many accommodated a negative**  
203 **value indicating an overall anti-correlation (i.e., dominance of antagonistic**  
204 **pleiotropy; Fig. 2b)**. Across all selection-dominated conditions, 84% of alleles  
205 showed antagonistic pleiotropy in at least one of the 36 pair wise comparisons,  
206 and 70% of alleles showed mild or strong antagonistic pleiotropy. These  
207 pleiotropic effects are far beyond experimental noise, as indicated by  
208 comparison to a control sample (**Fig. 2c**).

209 Overall, the dominance of pleiotropy meant that across all conditions  
210 **where selection acts**, 86% of the alleles were beneficial in at least one condition.  
211 However, not a single mutation was beneficial across all conditions. Further, if a

212 mutation were to be considered deleterious if purged under at least one  
213 condition, then 98% of the tested GudB mutations were deleterious.

214

### 215 **Combined action of selection and drift in heterogeneous environments**

216 In biofilms (and also in germination and soil colonization though to a lesser  
217 degree), irreproducibility between replicas, variability between codons (**Fig. 1c**  
218 & **d**), and the near-fixation of relatively few alleles (**Fig. 3**), all suggested fixation  
219 by chance. What is the nature of these few GudB ‘winners’, are they merely  
220 lucky?

221 While drift dominated in biofilms and soil colonization, curiously, wild  
222 type GudB was enriched in up to 85% of these experiments suggesting that  
223 selection **may also** play a role (**Fig. 3**). To assess the action of selection, we  
224 compared the three biofilm areas. There appears a systematic trend, whereby  
225 alleles enriched in the edge are more likely to arise from alleles that persisted or  
226 even enriched in the center (**Fig. 4a**). Similarly, 75% of the enriched edge alleles  
227 were neutral or beneficial under liquid growth with proline, a condition under  
228 which GudB experiences the strongest selection (**Fig. 4b**). This suggested that  
229 **although drift dominated GudB’s fate in biofilms**, GudB **was** under selection at  
230 **some** stage of biofilm development. Accordingly, we found that in biofilm centers  
231 the FC values are less skewed and more reproducible **than in the edge or**  
232 **wrinkles (Fig. S5b)** and the center  $\overline{SD}_{\text{syn}}$  values are half (**Table S3 & Fig. S3b**).  
233 The  $\overline{SD}_{\text{syn}}$  values are obviously **much** higher in the biofilms’ center compared to  
234 liquid cultures, but the trend suggests that at the onset of the biofilm’s  
235 development, selection acts on GudB (**Table S3 & Fig. S3b**). **Foremost, that wild**  
236 **type GudB was present at high frequency in the vast majority of biofilm**

237 experiments is not a coincidence that relates only to its high frequency in the  
238 initial mix. Indeed, a spiking experiment indicated that wild type was enriched  
239 by nearly 20-fold even when scarcely present in the initial mix (**Fig. 3f**).

240 Similarly, we searched signatures of selection in soil colonization – a  
241 process that involves multiple passages, beginning with a change of medium  
242 (Hoagland solution rinses; see **Methods**) and results in colonization of the roots.

243 As in biofilms, there is a statistically significant trend whereby alleles enriched in  
244 the root are more likely to arise from alleles that were enriched in the soil (**Fig.**  
245 **4c**). Further, 19 amino acid alleles were found to be enriched in at least 10 out of  
246 the 15 sequenced populations, suggesting some degree of reproducibility (**Table**  
247 **S5**). Selection during soil colonization is also manifested in the variation between  
248 biological replicas ( $\overline{SD}$  values) of alleles that were enriched in root populations  
249 being on average 20% smaller than those that were not (**Fig. 4d**). Finally, stop  
250 codons were purged in all biofilms and soil populations, indicating, as expected,  
251 that GudB's activity is required for *B. subtilis*' survival under these conditions  
252 <sup>22,23</sup>.

253 Altogether, in biofilms in soil colonization both drift and selection  
254 determine the fate of GudB alleles. We further examined the biofilms as  
255 described in the next section.

256

### 257 **Drift in biofilms relates to programmed prophage excisions**

258 Mutagenic rates in biofilms are high and mutations with a selective advantage  
259 rapidly take over (genetic sweeps) <sup>30,31</sup>. Growth in biofilms is also spatially  
260 defined, giving rise to segregated lineages whereby an entire segment of the  
261 biofilm's edge stems from a single cell in which a beneficial mutation had first

262 emerged <sup>12</sup>. GudB mutations that happen to be in these ‘founder’ cells might  
263 therefore fixate along these lineages. In pellicles that are largely considered as  
264 biofilms, intercellular matrix is produced <sup>32</sup> but spatial segregation is less  
265 pronounced than in solid biofilms. Accordingly, we found that in oppose to agar  
266 biofilms, in pellicles selection acts reproducibly (**Fig. 1**). To further establish that  
267 spatial segregation is a key factor, we divided the edges of the biofilm into small  
268 sections, and sequenced them. We found that most sections contained a single  
269 GudB allele (**Fig. S6**). Thus, in a way, the GudB allele represents a ‘barcode’ that  
270 reports single founder cells giving rise to individual sectors of the biofilm <sup>12</sup>.

271       What might be the mutations driving these genetic sweeps and spatial  
272 segregation? We sequenced samples for which enough genomic DNA was  
273 available (6 ordinary and 12 gradient biofilms, and for comparison, 2 initial mix,  
274 6 liquid and 4 pellicle samples). A range of single nucleotide polymorphisms  
275 (SNPs) in various loci was identified across these samples (**Data S3**). We  
276 focused, however, on identifying genomic mutations that were not, or scarcely  
277 observed in the initial mix and/or in liquid samples, suggesting that they  
278 emerged and enriched in the biofilms.

279       Foremost, we observed two large genome deletions that occurred in all  
280 biofilms with a frequency approaching 100% (**Fig. 5a & 5b**). These deletions  
281 correspond to the excision of two mobile genetic elements, or prophages, *skin*  
282 and SP- $\beta$  <sup>33-35</sup>. Excision of *skin* generates a functional protein: sigK - a  
283 sporulation-specific transcription factor essential for cell differentiation in *B.*  
284 *subtilis* <sup>36</sup>. The excision of SP- $\beta$  generates another functional protein dubbed  
285 SpsM - a protein involved in capsid polysaccharide biosynthesis mediating <sup>37</sup>  
286 and with relevance to pellicle development <sup>38</sup>. Nearly all biofilm cells carried one

287 of these variations, and most cells carried both (**Fig. 5a & b; Table S6 & Data**  
288 **S3**). **These prophage excisions therefore appear to be under stronger selection**  
289 **than the GudB mutations. The frequency of these structural variations gradually**  
290 **increases, from none in the initial mix to 100% in gradient biofilms (Fig. 5c), and**  
291 **so does the signature of GudB's drift (Fig. 1). However, at this stage, the**  
292 **observed link between the prophage excisions and GudB's drift is circumstantial**  
293 **and further experiments are needed to establish how are these two phenomena**  
294 **linked.** The prophage excisions are also likely to occur in the soil, but the DNA  
295 recovered from these samples was insufficient to allow genome sequencing.

296 Exclusively in biofilms, we also detected 59 enriched SNPs in a conserved  
297 region of 16S rRNA (**Table S6 & Data S3**). However, *B. subtilis* has ten 16S rRNA  
298 gene copies. Since these are essentially identical, we could not determine which  
299 of these 10 paralogues carried mutations. However, per population, 98% of the  
300 16S rRNA mutations occurred in the same Illumina read suggesting that one  
301 paralogue was highly mutated while others remained intact (**Fig. S7**). Large  
302 differences in expression levels of 16S rRNA genes were identified *in P.*  
303 *aeruginosa* biofilms<sup>39</sup>, and ribosomal heterogeneity has been linked to biofilm  
304 development in *B. subtilis*<sup>40</sup>. Yet, to our knowledge, mutations in the 16S rRNA  
305 genes have not been reported in biofilms. **At this stage, however, which 16S gene**  
306 **is inactivated, how do multiple proximal 16S mutations occur, and how**  
307 **inactivation affects biofilm development, remains unclear.** Overall, the 16S rRNA  
308 SNPs, and the structural variations in particular, seem to have a key role in  
309 biofilm development in *B. subtilis*. Accordingly, most of these genetic variations  
310 were reproducible between replica experiments (**Table S6**) suggesting that they

311 arose during biofilm growth and then enriched by virtue of promoting biofilm  
312 formation<sup>12</sup>.

313

#### 314 **Concluding remarks**

315 That the fitness effect of a mutation may vary depending on the environment is  
316 generally assumed. However, the magnitude of environmental pleiotropy  
317 unraveled here is surprisingly high. Environmental changes, including minute  
318 ones like addition of arginine to a proline medium, can completely revert the  
319 effect of *GudB* mutations. Overall 84% of the tested *GudB* mutations showed sign  
320 reversions. Pleiotropy severely restricts protein sequence space. Extensive  
321 pleiotropy has an interesting implication. The so-called wild type sequence of a  
322 gene-protein is generally thought to represent just one sequence out of an entire  
323 cloud of related sequences that are similarly fit. However, our results indicate  
324 that wild-type *GudB*'s sequence is singular in being fit across multiple constrains  
325 and environments. Per individual tested conditions, most mutations are either  
326 neutral or beneficial (28 - 81%). However, if all tested conditions are considered,  
327 only 2% of the tested *GudB* mutations are neutral or beneficial in the 9  
328 reproducible conditions when selection acts on *GudB*.

329 The pleiotropy of protein mutations across multiple growth and  
330 environmental conditions has been rarely measured<sup>17</sup>, and, to our knowledge,  
331 never for a protein with an intrinsic physiological role. Indeed, the extensive  
332 pleiotropy observed here might be the norm in cases of complex relationships  
333 between a protein's expression and activity levels ('protein fitness') and  
334 organismal fitness, as with *GudB*. The high degree of pleiotropy observed here  
335 may also relate to *GudB*'s role as an enzyme and regulator, and also to the

336 positions explored (oligomer interface). In any case, our results suggest that, as  
337 currently performed, laboratory mutational scans broadly underestimate the  
338 fraction of mutations that are deleterious in ‘real life’.

339 Together, pleiotropy and drift dictate **not only** the evolution of short-term  
340 polymorphism (micro-evolution) but also the evolution of protein sequences  
341 along long evolutionary times and across species (macro-evolution). **Indeed, the**  
342 correlation between the effects of mutations in laboratory mappings and their  
343 occurrence or absence in natural sequences is limited <sup>13</sup>. **However, laboratory**  
344 **mappings represent a single condition, and merging of data from multiple**  
345 **conditions could in principle reveal higher correlation. Identifying trends in**  
346 **complex datasets requires an unbiased approach. However, even when several**  
347 **different machine learning approaches were applied, merging of conditions gave**  
348 **no further correlation (Fig. S8).** Thus, along short evolutionary periods, proteins  
349 experience variable and opposing selection pressures. Additionally, drift may  
350 lead to rapid fixation of alleles that are marginally fit or even deleterious. The  
351 effects of drift have been extensively studied initiated by Kimura’s neutral theory  
352 <sup>11</sup>. Our results quantify its effect in bacterial populations and the potential effect  
353 of drift in combination with selection across different environments. For  
354 example, nearly 80% of the tested mutations survived or **even enriched during**  
355 sporulation, and a single spore **could then initiate** a whole new population.  
356 However, once the environment changes, such alleles will be rapidly lost unless  
357 compensated **or a priori enabled** by other mutations. **Compensation, or enabling**  
358 **by other mutations, results in epistasis, i.e., in the effect of mutations being**  
359 **dependent on the sequence context in which they occur** <sup>41</sup>. Accordingly, along

360 macro-evolutionary time scales, epistasis dominates gene and genome

361 sequences<sup>42</sup>.

362



## 363 References

- 364 1. Baba, T. *et al.* Construction of Escherichia coli K-12 in-frame, single-gene  
365 knockout mutants: The Keio collection. *Mol. Syst. Biol.* **2**, (2006).
- 366 2. Koo, B. M. *et al.* Construction and Analysis of Two Genome-Scale Deletion  
367 Libraries for Bacillus subtilis. *Cell Syst.* **4**, 291–305.e7 (2017).
- 368 3. Pache, R. A., Madan, M. M. & Aloy, P. Exploiting gene deletion fitness effects  
369 in yeast to understand the modular architecture of protein complexes  
370 under different growth conditions. *BMC Syst. Biol.* **3**, (2009).
- 371 4. Winzeler, E. A. *et al.* Functional characterization of the S. cerevisiae  
372 genome by gene deletion and parallel analysis. *Science (80- )*. **285**, 901–  
373 906 (1999).
- 374 5. Civelek, M. & Lusi, A. J. Systems genetics approaches to understand  
375 complex traits. *Nature Reviews Genetics* **15**, 34–48 (2014).
- 376 6. Steinberg, B. & Ostermeier, M. Environmental changes bridge evolutionary  
377 valleys. *Sci. Adv.* **2**, e1500921 (2016).
- 378 7. Wang, Z., Liao, B.-Y. & Zhang, J. Genomic patterns of pleiotropy and the  
379 evolution of complexity. *Proc. Natl. Acad. Sci.* **107**, 18034–18039 (2010).
- 380 8. Fusco, D., Gralka, M., Kayser, J., Anderson, A. & Hallatschek, O. Excess of  
381 mutational jackpot events in expanding populations revealed by spatial  
382 Luria-Delbrück experiments. *Nat. Commun.* **7**, (2016).
- 383 9. Kimura, M. Genetic variability maintained in a finite population due to  
384 mutational production of neutral and nearly neutral isoalleles. *Genet. Res.*  
385 *(Camb)*. **89**, 341–363 (2008).
- 386 10. Smith, N. H., Gordon, S. V., de la Rúa-Domenech, R., Clifton-Hadley, R. S. &  
387 Hewinson, R. G. Bottlenecks and broomsticks: The molecular evolution of  
388 Mycobacterium bovis. *Nature Reviews Microbiology* **4**, 670–681 (2006).
- 389 11. Nei, M. Selectionism and neutralism in molecular evolution. *Molecular*  
390 *Biology and Evolution* **22**, 2318–2342 (2005).
- 391 12. Steenackers, H. P., Parijs, I., Foster, K. R. & Vanderleyden, J. Experimental  
392 evolution in biofilm populations. *FEMS Microbiology Reviews* **40**, 373–397  
393 (2016).
- 394 13. Boucher, J. I., Bolon, D. N. A. & Tawfik, D. S. Quantifying and understanding  
395 the fitness effects of protein mutations: Laboratory versus nature. *Protein*  
396 *Science* 1219–1226 (2016). doi:10.1002/pro.2928
- 397 14. De Visser, J. A. G. M. & Krug, J. Empirical fitness landscapes and the  
398 predictability of evolution. *Nature Reviews Genetics* **15**, 480–490 (2014).
- 399 15. Fowler, D. M. & Fields, S. Deep mutational scanning: A new style of protein  
400 science. *Nature Methods* **11**, 801–807 (2014).
- 401 16. Steinberg, B. & Ostermeier, M. Shifting Fitness and Epistatic Landscapes  
402 Reflect Trade-offs along an Evolutionary Pathway. *J. Mol. Biol.* **428**, 2730–  
403 2743 (2016).
- 404 17. Dandage, R. *et al.* Differential strengths of molecular determinants guide  
405 environment specific mutational fates. *PLoS Genet.* **14**, (2018).
- 406 18. Earl, A. M., Losick, R. & Kolter, R. Ecology and genomics of Bacillus subtilis.  
407 *Trends in Microbiology* **16**, 269–275 (2008).
- 408 19. Branda, S. S., González-Pastor, J. E., Ben-Yehuda, S., Losick, R. & Kolter, R.  
409 Fruiting body formation by Bacillus subtilis. *Proc. Natl. Acad. Sci. U. S. A.*  
410 **98**, 11621–6 (2001).

- 411 20. Belitsky, B. R. & Sonenshein, A. L. Role and regulation of *Bacillus subtilis*  
412 glutamate dehydrogenase genes. *J. Bacteriol.* **180**, 6298–305 (1998).
- 413 21. Gunka, K. & Commichau, F. M. Control of glutamate homeostasis in *Bacillus*  
414 *subtilis*: A complex interplay between ammonium assimilation, glutamate  
415 biosynthesis and degradation. *Molecular Microbiology* **85**, 213–224  
416 (2012).
- 417 22. Liu, J. *et al.* Metabolic co-dependence gives rise to collective oscillations  
418 within biofilms. *Nature* **523**, 550–554 (2015).
- 419 23. Noda-Garcia, L., Romero Romero, M. L., Longo, L. M., Kolodkin-Gal, I. &  
420 Tawfik, D. S. *Bacilli* glutamate dehydrogenases diverged via coevolution of  
421 transcription and enzyme regulation. *EMBO Rep.* **18**, 1139–1149 (2017).
- 422 24. De Jong, L. *et al.* In-Culture Cross-Linking of Bacterial Cells Reveals Large-  
423 Scale Dynamic Protein-Protein Interactions at the Peptide Level. *J.*  
424 *Proteome Res.* **16**, 2457–2471 (2017).
- 425 25. Stannek, L. *et al.* Evidence for synergistic control of glutamate biosynthesis  
426 by glutamate dehydrogenases and glutamate in *Bacillus subtilis*. *Environ.*  
427 *Microbiol.* **17**, 3379–3390 (2015).
- 428 26. Mondal, S., Yakhnin, A. V., Sebastian, A., Albert, I. & Babitzke, P. NusA-  
429 dependent transcription termination prevents misregulation of global  
430 gene expression. *Nat. Microbiol.* **1**, (2016).
- 431 27. Besharova, O., Suchanek, V. M., Hartmann, R., Drescher, K. & Sourjik, V.  
432 Diversification of gene expression during formation of static submerged  
433 biofilms by *Escherichia coli*. *Front. Microbiol.* **7**, (2016).
- 434 28. Vlamakis, H., Chai, Y., Beauregard, P., Losick, R. & Kolter, R. Sticking  
435 together: Building a biofilm the *Bacillus subtilis* way. *Nature Reviews*  
436 *Microbiology* **11**, 157–168 (2013).
- 437 29. Mavor, D. *et al.* Determination of ubiquitin fitness landscapes under  
438 different chemical stresses in a classroom setting. *Elife* **5**, (2016).
- 439 30. Nguyen, D. & Singh, P. K. Evolving stealth: genetic adaptation of  
440 *Pseudomonas aeruginosa* during cystic fibrosis infections. *Proc. Natl. Acad.*  
441 *Sci. U. S. A.* **103**, 8305–8306 (2006).
- 442 31. Hallatschek, O., Hersen, P., Ramanathan, S. & Nelson, D. R. Genetic drift at  
443 expanding frontiers promotes gene segregation. *Proc. Natl. Acad. Sci.* **104**,  
444 19926–19930 (2007).
- 445 32. Lemon, K. P., Earl, A. M., Vlamakis, H. C., Aguilar, C. & Kolter, R. Biofilm  
446 development with an emphasis on *Bacillus subtilis*. *Current Topics in*  
447 *Microbiology and Immunology* **322**, 1–16 (2008).
- 448 33. Kunkel, B., Losick, R. & Stragier, P. The *Bacillus subtilis* gene for the  
449 developmental transcription factor  $\sigma(K)$  is generated by excision of a  
450 dispensable DNA element containing a sporulation recombinase gene.  
451 *Genes Dev.* **4**, 525–535 (1990).
- 452 34. Nicolas, P. *et al.* Condition-dependent transcriptome reveals high-level  
453 regulatory architecture in *Bacillus subtilis*. *Science (80- )*. **335**, 1103–1106  
454 (2012).
- 455 35. Westers, H. *et al.* Genome Engineering Reveals Large Dispensable Regions  
456 in *Bacillus subtilis*. *Mol. Biol. Evol.* **20**, 2076–2090 (2003).
- 457 36. Eichenberger, P. *et al.* The program of gene transcription for a single  
458 differentiating cell type during sporulation in *Bacillus subtilis*. *PLoS Biol.* **2**,  
459 (2004).

- 460 37. Abe, K. *et al.* Developmentally-Regulated Excision of the SP $\beta$  Prophage  
461 Reconstitutes a Gene Required for Spore Envelope Maturation in *Bacillus*  
462 *subtilis*. *PLoS Genet.* **10**, (2014).  
463 38. Martin, M. *et al.* De novo evolved interference competition promotes the  
464 spread of biofilm defectors. *Nat. Commun.* **8**, (2017).  
465 39. Pérez-Osorio, A. C., Williamson, K. S. & Franklin, M. J. Heterogeneous rpoS  
466 and rhlR mRNA levels and 16S rRNA/rDNA (rRNA Gene) ratios within  
467 *Pseudomonas aeruginosa* biofilms, sampled by laser capture  
468 microdissection. *J. Bacteriol.* **192**, 2991–3000 (2010).  
469 40. Vesper, O. *et al.* Selective translation of leaderless mRNAs by specialized  
470 ribosomes generated by MazF in *Escherichia coli*. *Cell* **147**, 147–157  
471 (2011).  
472 41. Miton, C. M. & Tokuriki, N. How mutational epistasis impairs predictability  
473 in protein evolution and design. *Protein Sci.* 1260–1272 (2016).  
474 doi:10.1002/pro.2876  
475 42. Breen, M. S., Kemena, C., Vlasov, P. K., Notredame, C. & Kondrashov, F. A.  
476 Epistasis as the primary factor in molecular evolution. *Nature* **490**, 535–  
477 538 (2012).  
478 43. Konkol, M. A., Blair, K. M. & Kearns, D. B. Plasmid-encoded comI inhibits  
479 competence in the ancestral 3610 strain of *Bacillus subtilis*. *J. Bacteriol.*  
480 **195**, 4085–4093 (2013).  
481 44. Yi, Y., de Jong, A., Frenzel, E. & Kuipers, O. P. Comparative transcriptomics  
482 of *Bacillus mycoides* root exudates reveals different genetic adaptation of  
483 endophytic and soil isolates. *Front. Microbiol.* **8**, (2017).  
484 45. Deatherage, D. E. & Barrick, J. E. Identification of mutations in laboratory-  
485 evolved microbes from next-generation sequencing data using breseq.  
486 *Methods Mol. Biol.* **1151**, 165–188 (2014).  
487  
488

## 489 Acknowledgments

490 L.N.G. was supported by the CONACYT grant #203740 and the Martin Kushner  
491 Fellowship at the Weizmann Institute of Science. D.S.T. is the Nella and Leon  
492 Benozio Professor of Biochemistry. Financial support by the Kahn Center for  
493 Systems Biology at the Weizmann Institute of Science is gratefully  
494 acknowledged. We are highly grateful to Ron Milo, Sarel Fleishman, Zvi Livneh  
495 and Fyodor Kondrashov for support and critical advice, to Einat Segev, Arjan de  
496 Visser for critical and insightful comments to the manuscript. We highly  
497 appreciate the help of Moshe Hershko in script development for data processing,  
498 and of Yinon Bar-On, Shmuel Gleizer in the analysis of genomic sequences. We

499 are grateful to Ron Rotkopf from the Weizmann Life Sciences Core Facilities for  
500 his guidance on the statistical analysis. We are thankful for the services provided  
501 by the Crown Genomics institute of the Nancy and Stephen Grand Israel National  
502 Center for Personalized Medicine, Weizmann Institute of Science.

503

#### 504 **Authors Contribution**

505 L.N.G. and D.S.T. designed experiments and wrote the manuscript. L.N.G., D.D.  
506 and D.S.T. analysed the data. L.N.G. performed all experiments, except selection  
507 in soil colonization that was performed in collaboration with E.K. and A.A. D.D.  
508 and A.E. wrote the scripts used for data analysis and visualization. E.P. applied  
509 machine learning classification.

510 **Fig. 1. Selection versus chance-dominated conditions. (A)** Dot-plot indicating  
511 reproducible measurements of frequency coefficients of individual mutations  
512 (FC values) in three parallel replica liquid cultures with proline as carbon-  
513 nitrogen source.  $\overline{SD}$  is the average standard deviation between 3 biological  
514 replicas. The S.D. values were calculated per each amino acid allele based on  
515 logFC values and averaged for all alleles in a given condition. **(B)** The same  
516 analysis of three parallel biofilms with arginine as carbon-nitrogen source  
517 indicates low reproducibility. **(C)** The  $\overline{SD}$  values categorized by the 7 general  
518 growth states tested here. Each point represents the  $\overline{SD}$  value between 3 replicas  
519 of the same experiment (the distributions of SD values per each condition are  
520 shown in **Fig. S3a**). **(D)**  $\overline{SD}_{syn}$  represents the standard deviation between the  
521 logFC values of synonymous codons. The standard deviations per allele were  
522 averaged for all synonymous alleles in the same replica experiment, and then  
523 averaged across the 3 replica experiments in a given condition (the distributions  
524 of  $SD_{syn}$  values per experiment are shown in **Fig. S3b**).  
525

526 **Fig. 2. The pleiotropic effects of alleles across different conditions.** (A) A  
527 dot-blot correlation of FC values of individual alleles in three different liquid  
528 carbon-nitrogen sources (average values per 3 replicas). The red squares  
529 encompass alleles that show sign pleiotropy – i.e., a change from beneficial to  
530 deleterious, or vice versa. (B) Pairwise correlation of the FC values in all 9  
531 different reproducible conditions (3 replicas per condition; average FC values of  
532 all alleles and replicas). Colors indicate the Pearson correlation values (-1,  
533 negative correlation; 0, no correlation; 1, positive correlation). The strongest  
534 anti-correlation was found with arginine as carbon-nitrogen source (black  
535 square). (C) The distribution of alleles by their level of sign pleiotropy; from pale  
536 to dark purple: (i) Weak sign pleiotropy (changes between deleterious and  
537 beneficial); (ii) Mild sign pleiotropy (changes from highly deleterious to  
538 beneficial, or from highly beneficial to deleterious); and (iii) Strong sign  
539 pleiotropy (changes from highly deleterious to highly beneficial, or vice versa).  
540 The fraction of alleles showing mild or strong sign pleiotropy is shown above the  
541 bars. The control dataset comprises 4 completely independent growth  
542 experiments in liquid proline, each inoculated from a different initial mix and  
543 grown on separate occasions (Fig. S9). Nonetheless, none of the alleles in this  
544 control set exhibited strong pleiotropy. Accordingly, a Chi-squared analysis  
545 indicated that the variations between conditions are significantly higher than the  
546 variations in the control group ( $\chi^2$  and p values are shown; degrees of freedom  
547 equal 3 in all cases).  
548

549 **Fig. 3. Genetic sweeps in biofilms and soil and the dominance of the wild-**  
550 **type allele.** Photographs of 5 days old biofilms: (A) normal biofilms; (B)  
551 gradient biofilms; (C) a scheme of soil colonization (shown biofilms with proline  
552 as carbon-nitrogen source). (D) The distribution of frequency of individual  
553 alleles for different growth states with proline as carbon-nitrogen source. Bar  
554 widths represent allele frequency from raw read counts (Rf values; **Data S1**).  
555 Magenta corresponds to wild type GudB. (E) Alleles with  $R_f \geq 1\%$  were identified  
556 and their number and sum of frequencies are shown (averages and standard  
557 deviations for all experiments in a given condition). Blue designates selection-  
558 dominated conditions and red drift-dominated ones, as in **Fig. 1**. (F) An initial  
559 mix of 4 alleles was created including the wild-type allele at a varying frequency  
560 from 1 up to 25%. Following growth in normal and gradient biofilm with proline,  
561 the frequency of wild-type reached an average of 18% when initiated at 1%, and  
562 up to 100% when initiated at 5% (see **Fig. S10** for the entire dataset).  
563

564 **Fig. 4. The combined action of selection and chance in biofilms (red) and**  
565 **soil colonization (green). (A)** Alleles that enriched in the edge of the biofilms  
566 are more likely to arise from alleles that were neutral or enriched in the center.  
567 The distribution of categorized FC values from all biofilm centers (grey)  
568 compared to the distribution of FC values of center alleles that were enriched in  
569 the edge (red). **(B)** The distribution of categorized FC values of all alleles in all  
570 liquid conditions (grey) compared to the distribution of FC values of liquid  
571 alleles that were enriched in the edge of biofilms (red). **(C)** Alleles enriched in  
572 the root are more likely to arise from alleles that were enriched in the bulk soil.  
573 The distribution of categorized allele FC values in all soil samples (grey)  
574 compared to the distribution of FC values of soil alleles that were enriched in the  
575 root (green). **(D)** The distribution of SD values (variability between replica  
576 experiments, as in **Fig. 1c**) of alleles enriched in one or more root populations  
577 compared to alleles that were never enriched in the roots. **T-tests were**  
578 **computed per each FC category. p-values indicating significance ( $p < 0.05$ ) are**  
579 **presented above the bars (details of all the T-tests are provided in **Table S7**).**  
580



581 **Fig. 5. Programmed genomic excisions drive GudB's drift in biofilms.**

582 Schematic representation of *B. subtilis* genomic organization before and after the  
583 excision of the prophage mobile elements SP- $\beta$  (**A**) and *skin* (**B**) and their  
584 position in the genome. (**C**) These excisions were absent in the initial mix yet  
585 dominated biofilms and went to near fixation in the edge of gradient biofilms (for  
586 frequencies in individual experiments see **Table S6**). Excision of the mobile  
587 elements occurred in two different genomic locations within the same  
588 experiment. The values were summed and averaged according to the general  
589 condition shown. The details of the excisions (location and frequency) per  
590 experiment are shown in **Data S3**.

591

## 592 **Materials and Methods**

### 593 **Strains**

594 *B. subtilis* NCIB 3610 DS7187 (**kindly** gifted by Dr. Daniel B. Kearns <sup>43</sup>) that lacks  
595 the ComI peptide and has high competence capacity similar to domesticated *B.*  
596 *subtilis* strains was recruited to this study. *Bacillus subtilis* NCIB 3610 *gudB::tet*  
597 strain <sup>23</sup> genomic DNA was transformed into *B. subtilis* NCIB 3610 DS7187. *B.*  
598 *subtilis* NCIB 3610  $\Delta$ *comI gudB::tet* was thus isolated, and was phenotypically  
599 and genetically tested.

600

### 601 **GudB allele library construction**

602 We performed site directed mutagenesis in 10 codons (amino acids: M46, L48,  
603 K52, D58, D59, S61, K63, T66, Y68, S75) of the *gudB* gene cloned in the  
604 **pDG\_GudB plasmid, which was modified from the pDG1728 backbone vector** <sup>23</sup>.  
605 The codons were mutated to NNS (N = all bases & S = C or G) whereby the 20  
606 standard amino acids and 1 stop codon is encoded. The codon mutagenesis was  
607 done in one step PCR protocol and independently for each position. Thus, we  
608 created 10 libraries, each containing 20 different amino acid alleles (non-  
609 synonymous, missense mutations), 1 stop-codon (nonsense), and 11  
610 synonymous alleles (alternative codons encoding the same amino acid). All  
611 mutagenic PCRs were performed with Kapa HiFi HotStart Ready Mix (Kapa  
612 Biosystems) following manufacturers conditions (**Table S8** shows the sequence  
613 of all primers). The 10 PCR products were purified and used to transform the *E.*  
614 *coli* T10 strain (Thermo Fisher Scientific). Clones were pulled together after an  
615 overnight growth on LB + Ampicillin (100  $\mu$ g/ml) agar plates at 37°C. At this  
616 stage, 4 to 6 clones per library were isolated and analyzed by sequencing. Total  
617 plasmid DNA from these library transformations was extracted and also  
618 analyzed by sequencing. Each of the 10 libraries contained, after transformation,  
619 at least 10<sup>5</sup> clones, corresponding to  $\geq$  1000-fold coverage per allele.  
620 Approximately 10  $\mu$ g of plasmid DNA, from each library, was linearized (XhoI,  
621 New England Biolabs, following manufactures conditions), purified, and used to  
622 transform the *B. subtilis* NCIB 3610 *gudB::tet*  $\Delta$ *comI* strain. Transformations were  
623 performed as described <sup>23</sup>. After transformation, overnight growth on in +  
624 Spectinomycin (100 $\mu$ g/ml) + Glucose (0.5 mg/ml) agar plates was used as

625 selection. The resulting cells were pulled together and kept at -20°C in 50%  
626 glycerol. In total, 10 *B. subtilis* libraries were constructed in parallel and each  
627 contained, after transformation, at least 10<sup>4</sup> clones (≥100-fold coverage per  
628 allele). Genomic DNA extraction of each library was performed (GenElute -  
629 Sigma). The integrity of the mutagenic process was verified by sanger  
630 sequencing the *amyE::gudB* locus indicating that mutations were observed only  
631 in the diversified codon.

632

### 633 **Selection and growth conditions**

634 10 ml of LB (1% tryptone, 5% yeast extract and 1% NaCl) with Glucose (0.5%),  
635 ammonium sulfate (0.5%) and spectinomycin (100 µg/ml) cultures were  
636 inoculated with 1 ml of each library stock. The cultures were grown overnight at  
637 37°C with shaking. 500 µl of the overnight culture was used to inoculate 3 ml of  
638 LB plus glucose (0.5%) and ammonium sulfate (0.5%). The cultures were  
639 incubated at 37°C with shaking and once the O.D.<sub>600</sub> reached 0.8 they were mixed  
640 equally and used as the starting population (initial mix). A fraction of the cells at  
641 this stage were harvested by centrifugation and stored for genomic DNA  
642 purification. In total, three different initial mixes were used for the experiments  
643 described here. Initial Mix #1 was used to inoculate most liquid conditions (4  
644 carbon-nitrogen sources), pellicles and gradient biofilms. Initial Mix #2 was used  
645 to inoculate 1 liquid condition, spores, germination and biofilms, and initial mix  
646 #3 was used to inoculate bulk soil (**Data S1**). Detailed selection conditions are  
647 listed below:

648 For selection under liquid serial passages 100 µl of the initial mix was used to  
649 inoculate 10 ml cultures of MS medium (5 mM potassium phosphate, 100 mM  
650 MOPS pH 7.1, 2 mM MgCl<sub>2</sub>, 700 µM CaCl<sub>2</sub>, 50 µM MnCl<sub>2</sub>, 50 µM FeCl<sub>3</sub>, 1 µM ZnCl<sub>2</sub>,  
651 2 µM thiamine, 50 µg/ml tryptophan, 50 µg/ml phenylalanine and 50 µg/ml  
652 threonine)<sup>23</sup> with glucose (0.5%) plus ammonium sulfate (0.5%), glutamate  
653 (0.5%) plus glycerol (0.5%), proline (0.5%), arginine (0.5%) or proline (0.25%)  
654 plus arginine (0.25%). The cultures were incubated at 30°C with shaking until  
655 O.D.<sub>600</sub> reached 1 – 1.5, after which 100 µl was used to inoculate 10 mL of fresh  
656 medium. The serial passages were done every 24 hours when proline (0.5%),  
657 arginine (0.5%) or proline (0.25%) plus arginine (0.25%) were used as carbon-

658 nitrogen sources, and every 12 hours when glucose (0.5%) plus ammonium  
659 sulfate (0.5%), or Glutamate (0.5%) plus glycerol (0.5%), were applied. In total,  
660 all liquid passages were maintained for approximately 50 generations.

661 For selection in pellicles, 100 ml of media (b), (c) and (d) were inoculated with  
662 100  $\mu$ l of the initial mix cells. The culture was incubated at 30°C without shaking,  
663 for 5 days.

664 For selection of spores and germinated spores, three ml of the initial mix was  
665 used to inoculate 25 ml of Difco Sporulation Medium (DSM) in 250 ml flasks and  
666 incubated at 37°C with 150 rpm shaking until O.D.600 reached 0.4. This culture  
667 was used to inoculate 250 ml of fresh DSM in 1L flasks. The cultures were  
668 incubated 48h at 37°C with 150 rpm shaking. Cells were subsequently harvested  
669 by centrifugation and stored at 4°C over night. After, cells were re-suspended  
670 with 200 ml of cold deionized sterile water (dW) and incubated for 30 min at  
671 4°C. Cells were harvested and re-suspended with 200 ml of cold distilled water  
672 (dW) and incubated overnight at 4°C with slow orbital agitation, to kill all  
673 planktonic of vegetative cells. The culture was harvested, re-suspended in 30 ml  
674 of dW and heated to 80°C for 20 min. Finally, spores were harvested, re-  
675 suspended in 10 ml of dW, and stored at -20°C. To germinate these spores, they  
676 were diluted 1000 times in phosphate-buffered saline solution and 100  $\mu$ l of this  
677 suspension was used to inoculate LB plus glucose (0.5%) agar plates (10 plates).  
678 Approximately 10,000 colonies were obtained and pulled together.

679 For selection in biofilms, MS agar (1.5%) plates supplemented with different  
680 carbon-nitrogen sources were prepared. For gradient biofilms, gradient agar  
681 plates were prepared. First, square plates (12x12 cm) with MS agar (1.5%)  
682 medium were poured. After the agar solidified, an area of 2x14 cm was removed  
683 from the top of the plate. In this area, a solution of either Proline 5%, Arginine  
684 5%, monosodium glutamate 5% or Glycerol 5% in 1.5% agar was poured into  
685 the removed section. For the glutamate plus glycerol gradient biofilm, two  
686 opposite areas of the agar plate were removed. Into one, a solution of  
687 monosodium glutamate (5%) in 1.5% agar was poured, and into the other,  
688 glycerol (5%) plus 1.5% agar solution (see **Fig. S11a** for a graphic  
689 representation of the agar plates preparation). All gradient agar plates were  
690 incubated for 24 h at room temperature before use. We also calibrated the place

691 in the gradient plate where we inoculated the cells such that we observed  
692 growth after 1 night incubation at 30°C (**Fig. S11b**). For growth in biofilms and  
693 gradient biofilms, 5 µl of the initial mix were used as inoculum. Plates were  
694 incubated for 4 days at 30°C and 2 more days at room temperature. The colony  
695 was then dissected in 3 areas (center, wrinkle and edge) for normal biofilms, and  
696 in 2 areas (center and upper) for gradient biofilms (illustrated in **Fig. S11c-g**).  
697 After selection in all the above-mentioned conditions the biomass was harvested  
698 and storage at -20°C. All growth experiments were performed in triplicate by  
699 inoculating with the same initial mix.

700 For selection in soil and plant roots, the initial mix was generated as above-  
701 mentioned except that the process was scaled up (instead of 3 ml, 10 ml of  
702 culture was prepared per library). In total, 200 ml of the initial mix (O.D.<sub>600</sub> = 0.8)  
703 was applied. This LB culture was washed three times (by means of centrifugation  
704 and re-suspension) with 100 ml half strength Hoagland solution<sup>44</sup>. After the final  
705 wash, the cells were re-suspended in half strength Hoagland solution to a final  
706 O.D.<sub>600</sub> of 0.1. Since Hoagland's solution is not isotonic, the washes resulted in  
707 death of about a third of the *B. subtilis* cells. Thus, handling the samples at this  
708 stage was performed as fast as possible. **The Hoagland solution imposes some  
709 selection pressure on the initial mix population although the loss in population  
710 size is relatively small (≤30%). The soil colonization FC values therefore result  
711 from the entire process that begins the rinses with the Hoagland solution and  
712 ends with the colonization of the roots.** Natural soil was collected at the Ha-  
713 Masrek Reserve, Israel (31.793 N, 35.042 E), sifted through 2 mm sieve and  
714 autoclaved three times for 30 min at 121°C. A total of five pots (size 10 x 8 x 5  
715 cm) with autoclaved natural soil were drenched with the initial mix suspended in  
716 half strength Hoagland Solution<sup>44</sup>. These potted soils drenched with bacterial  
717 suspensions were used to plant tomato seedlings grown first in sterile  
718 conditions. Seeds of tomato (*Solanum lycopersicum L.*; cv. Micro-Tom) were  
719 surface-sterilized with 70% ethanol for 5 minutes and, 10 minutes with 3%  
720 bleach with 0.01% Tween 20. Surface-sterile seeds were germinated on sterile  
721 filter paper (Whatman, catalog # 1001-085) saturated with half strength  
722 Hoagland Solution for 7 days (23°C and 16 hours photoperiod). Six tomato  
723 seedlings were transferred to each pot and grown for one month (21°C, 16h

724 light, 8h dark) with drenching with half strength Hoagland twice a week. Plants  
725 were subsequently harvested from the five pots. Roots and rhizosphere samples  
726 were collected for each replica experiment consisting a pool of six roots. First,  
727 the plants were carefully removed from the soil. Roots were then cut out from  
728 the plants and vortexed in 20 ml of washing solution (0.85% NaCl) for 30 s. This  
729 step was repeated one more time with a fresh washing solution. The combined  
730 root washing solutions (40 ml) was centrifuged for 30 min at 3000 rpm and the  
731 resulted pelleted samples corresponding to the rhizosphere were frozen in liquid  
732 nitrogen and stored at -80°C. The washed roots were blotted in filter paper and  
733 stored at -80°C until further use. Finally, bulk soil without roots was also stored  
734 at -80°C.

735

### 736 **Genomic DNA extraction**

737 All samples, including pellicle, spores, biofilm and gradient biofilm samples, were  
738 defrosted and re-suspended in 10 ml of dW. The samples were sonicated at 40%  
739 power, VibraCell, Sonics, for 10 min at 60 s intervals. Cells debris was harvested  
740 by centrifugation (13,000 g for 20 min). Genomic DNA from all samples was  
741 extracted using the GenElute Bacterial Genomic DNA Kit (Sigma-Aldrich)  
742 generally following the manufacturer's instructions, with the exception of the  
743 soil, rhizosphere soil and plant roots samples. For these samples, the PowerSoil  
744 DNA Isolation kit of Mo Bio was used, following its manufacturer's instructions.

745

### 746 **Illumina sample preparations**

747 The mutagenized *gudB* fragment (from amino acids 45 to 81) was amplified  
748 using the primers GudB\_In\_For (5'-  
749 CTCTTTCCCTACACGACGCTCTTCCGATCTnnnnnnCCCGAAGAGGTATACGAATTGT  
750 TAAAAGAG), and GudB\_In\_Rev (5'-  
751 CTGGAGTTCAGACGTGTGCTCTTCCGATCTCGCCTTTCGTTGGACCGAC). To the  
752 GudB\_In\_For primer, 6 N's were added to increase the sequence variability  
753 between amplicons. PCRs were performed with the KapaHiFi HotStart Ready Mix  
754 (Kapa Biosystems) using approximately 100 ng of genomic DNA as template and  
755 following manufacturer's instructions. Using 10 µl of the PCR as template, a  
756 second PCR was performed to add the Illumina adaptor sequence, using primers

757 GudB\_Out\_For (5'-  
758 AATGATACGGCGACCACCGAGATCTACACTCTTTCCCTACACGACGC) and  
759 GudB\_Out\_Rev (5'-  
760 CAAGCAGAAGACGGCATAACGAGATTGTTATACGTGACTGGAGTTCAGACGTGTGC).

761 The Illumina index (underlined) was changed in the GudB\_Out\_Rev primer to  
762 different Illumina indexes. Each condition was differently barcoded. All PCRs  
763 were purified using the Agencourt AMPure XP (Beckman Coulter). The  
764 concentration of PCR products was verified using Qu-bit assay (Life  
765 Technologies).

766

### 767 **Analysis of the Illumina reads**

768 DNA samples were run using the Illumina NextSeq 150-bp paired-end kit. The  
769 FASTQ sequence files were obtained for each run and customized using MatLab  
770 8.0 and Python 3.6 scripts designed to count the number of each individual allele  
771 in each sequenced sample. We filtered the reads to exclude any reads that have  
772 mutations outside the mutagenized codons. All codons encoding for the wild-  
773 type amino acid were summed in one and assigned as WT. All other codons were  
774 counted independently. The unprocessed read counts are shown in **Data S1**.  
775 Further filtering excluded alleles with < 100 counts in the initial mix to avoid  
776 statistical uncertainty with respect to FC values. In total, we obtained data for up  
777 to 269 individual alleles per condition out of the originally introduced 320  
778 alleles. Per condition, a minimum of 380,000 reads was obtained. Thus, in  
779 average, we obtained 1500 reads per allele.

780

### 781 **Data Analysis**

782 The frequency of each allele ( $f_i$ ) was calculated as the ratio between the number  
783 of reads for allele  $i$  divided by the total number of reads. The allele frequency  
784 coefficient ( $FC_i$ ) was subsequently calculated as the ratio of after selection ( $f_i$ )  
785 divided by the frequency of the same allele in the initial mix (**Fig. S2 & Data S2**).  
786 Normalization by the number of wild-type reads rather than by the total number  
787 of reads gave essentially identical FC values for the majority of samples.  
788 However, in the few samples where wild-type frequency was significantly  
789 reduced after selection, normalization resulted in high noise and large biases

790 including large changes in sign (higher sign pleiotropy). FC values were  
791 therefore derived from the unnormalized frequency (fraction of reads for a given  
792 allele out of the total number of reads). FC values relate to fitness  
793 logarithmically, and thus logFC values were compared. To this end, all FC's equal  
794 to zero had to be changed, and we opted for a tenth of the minimum FC value  
795 found amongst all experiments. For the liquid, pellicles, biofilms, spores and  
796 germinated spores experiments (**Data S2, sheet 1**) the zeros were changed to  
797  $4.2 \times 10^{-6}$ . For the bulk soil experiments (**Data S2, sheet 2**) zeros were changed  
798 to  $1.14 \times 10^{-5}$ . The logarithm of all FC values was calculated and was also used to  
799 derive mean FC values. The logFC values were then used to calculate: (i) the  
800 standard deviation for all alleles across conditions ( $\overline{SD}$ ; the standard deviation  
801 between logFC values observed per each allele in replica experiments were  
802 averaged for all alleles measured in a given condition); (ii) the standard  
803 deviation between synonymous codons within the same replica experiment  
804 (deviations between logFC values of synonymous codons of the same amino acid  
805 allele were calculated, averaged for all alleles in the same experiment, and then  
806 for all replica experiments per condition). The T, F,  $X^2$  tests and Pearson  
807 correlation values were obtained using the PRISM software. The Levene's test  
808 was performed using R. In addition, **Table S9** from supplementary material  
809 shows the sample size for every test performed in this study.

810

### 811 **Defining the limits of neutrality**

812 From all conditions tested here, only in glucose plus ammonia the GudB  
813 knockout had no growth effect (**Fig. S1**). Hence, this condition is largely neutral,  
814 and the variation observed in FC values would primarily be the outcome of noise.  
815 The standard deviation between 3 biological replicas was calculated per allele,  
816 and these values spanned over the range of 0.002 to 0.199. We rounded this  
817 number to 0.2. Thus, by the strictest measure, FC values between 0.8 and 1.2  
818 were classified as 'neutral'. Accordingly,  $FC \leq 0.8$  unambiguously assigned a  
819 mutation as 'deleterious', and  $FC > 1.2$  as 'beneficial'.

820

### 821 **Genome sequencing**



822 We sequenced the genomic DNA of all biofilm populations for which we had  $\geq 1$   
823  $\mu\text{g}$  of DNA after extraction (6 normal and 12 gradient biofilm). For comparison,  
824 we also sequenced initial mix populations 1 and 2, 6 Liquid and 4 pellicle  
825 populations. The Illumina HiSeq2500 platform was used, with 2x125 base pairs  
826 read length. We obtained a total of 300 million reads. The reads were assembled  
827 using as reference the *B. subtilis* NCIB 3610 genome (NCBI Accession number:  
828 CP020102). Overall, 95% of all reads were successfully mapped to the reference  
829 genome with minimal coverage of x300 for all samples analyzed. The Breseq  
830 program was used to identify genomic variants, including single nucleotide  
831 polymorphisms (SNPs) and insertion-deletion polymorphisms (INDELs) <sup>45</sup> (**Data**  
832 **S3 & Table S6**).

833

#### 834 **Comparison of FC values and to GudB's natural sequence variability**

835 We examined whether the FC values for individual mutations, in individual  
836 conditions, **and in combinations thereof**, might predict whether or not a certain  
837 sequence exchange is observed, or not, amongst the sequences of **naturally**  
838 **occurring** GDHs. To this end, we constructed a number of different support  
839 vector machines (SVM) classification models with a variety of kernels (such as  
840 linear, Gaussian, polynomial etc.). The feature vector of each GudB allele was  
841 composed from the normalized FC values from specific condition. The values  
842 from replica experiments of the highly reproducible liquid conditions were  
843 averaged prior to training. Based on the multiple sequence alignment containing  
844 1013 GDH sequences, we divided the GudB mutations in our dataset into 3  
845 categories, which were then utilized as the prediction labels: (1) mutations seen  
846 in less than 5 natural GDH sequences (classified as 'not present', 66% of  
847 mutations), (2) mutations observed in 5 - 49 sequences ('rare', 19%) and (3)  
848 mutations present in  $\geq 50$  sequences ('frequent', 15%). Introducing class weights  
849 into the loss function compensated the unbalanced nature of the dataset. For  
850 each feature combination of a varied length, we built an SVM classification model  
851 and assessed its accuracy using 3-fold cross validation. Additionally, in order to  
852 reduce noise, assuming that our data belong to linear space, we extracted the  
853 first ten principal components of the feature matrix and used them as the new  
854 feature vectors for a model construction. To examine if our relatively high ( $>0.6$ )

855 model accuracy was distributed uniformly across different classes, for each  
856 model and genotype, we recorded the predicted values during 3-fold cross-  
857 validation. Moreover, for each condition combination, and for each kernel, we  
858 built 100 different models and recorded the number of times each of the  
859 genotypes was predicted correctly.

860

861

**A**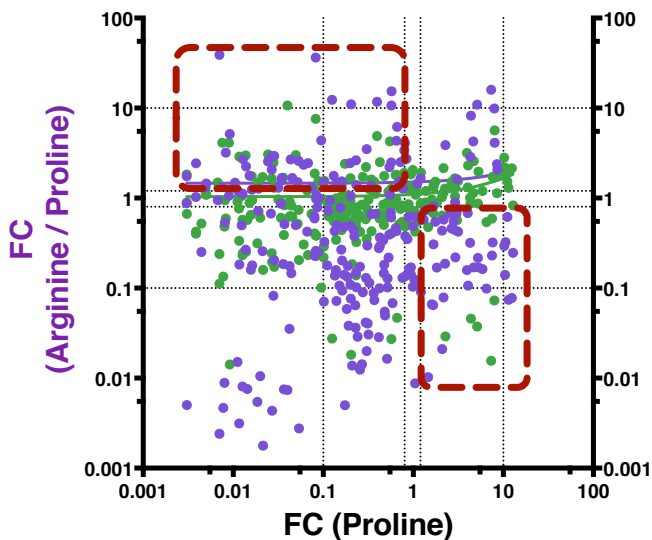**B**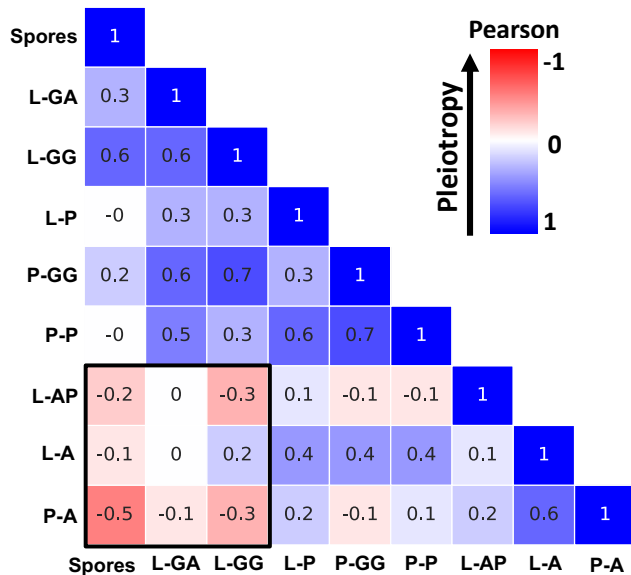**C**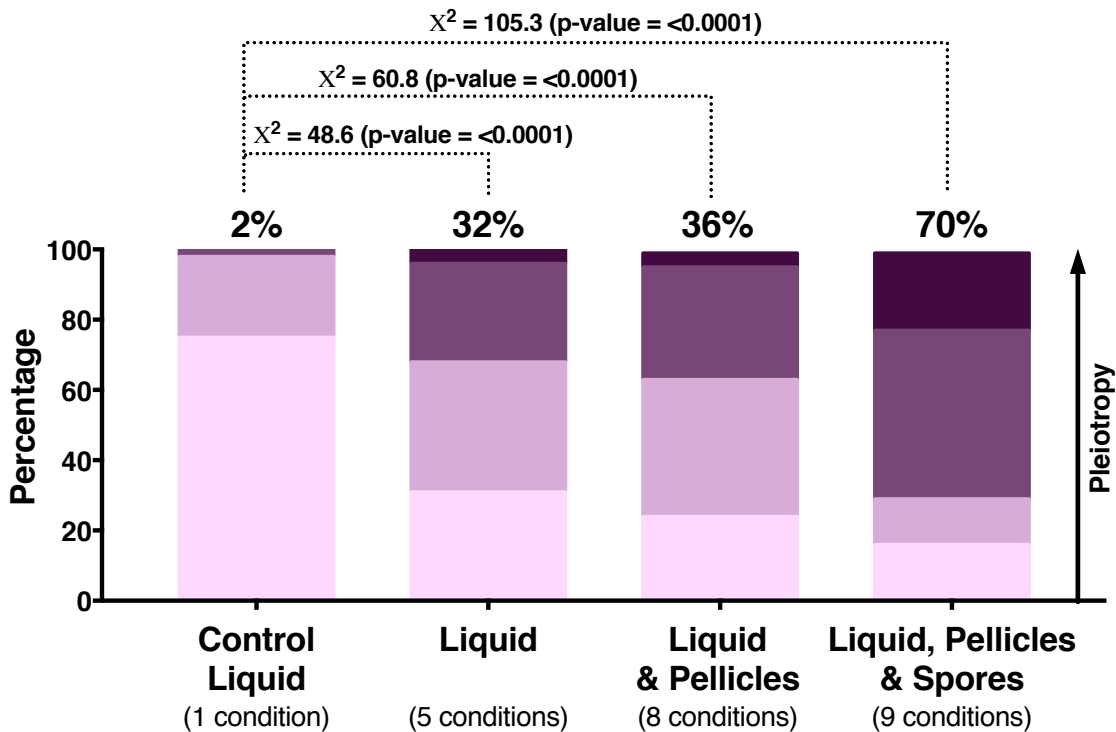

**A**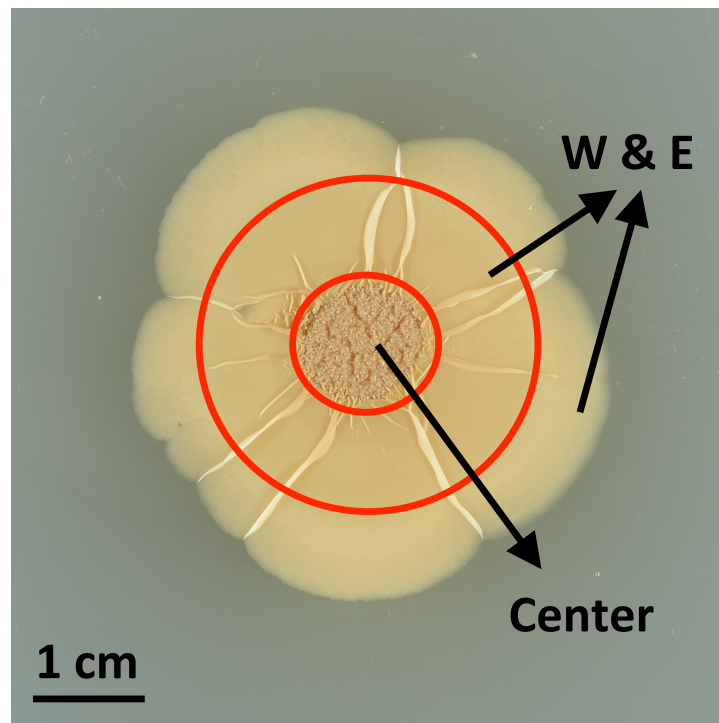**B**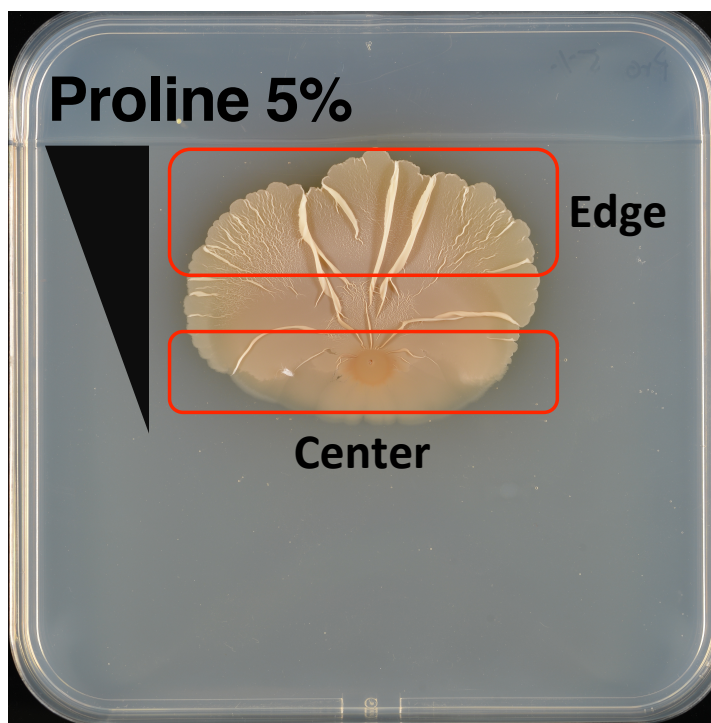**C**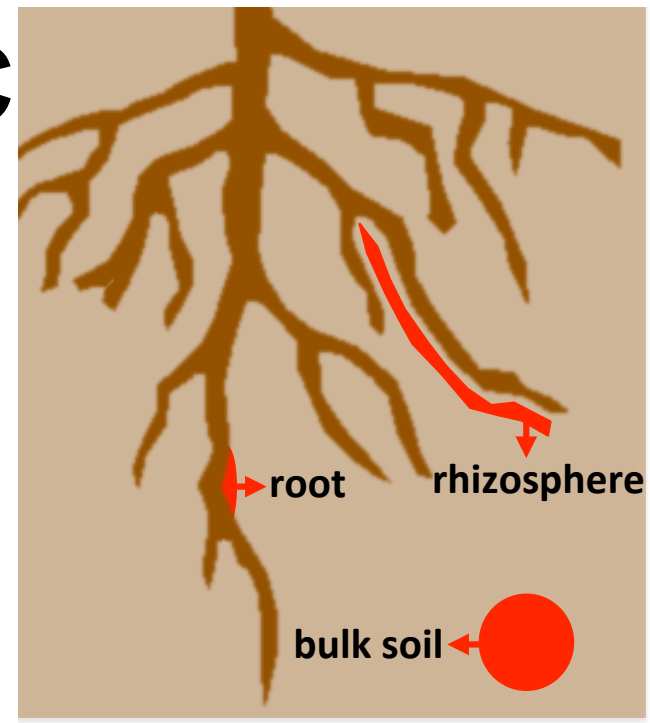**D**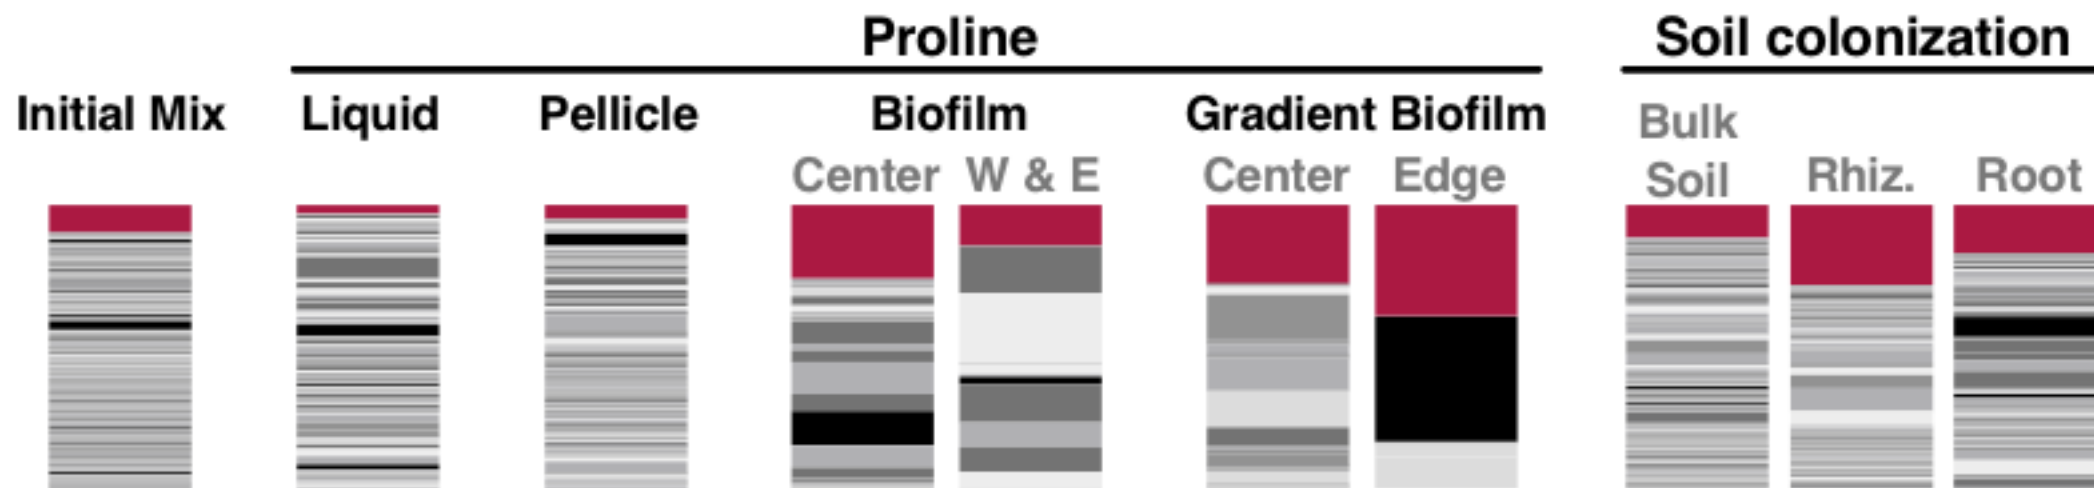**E**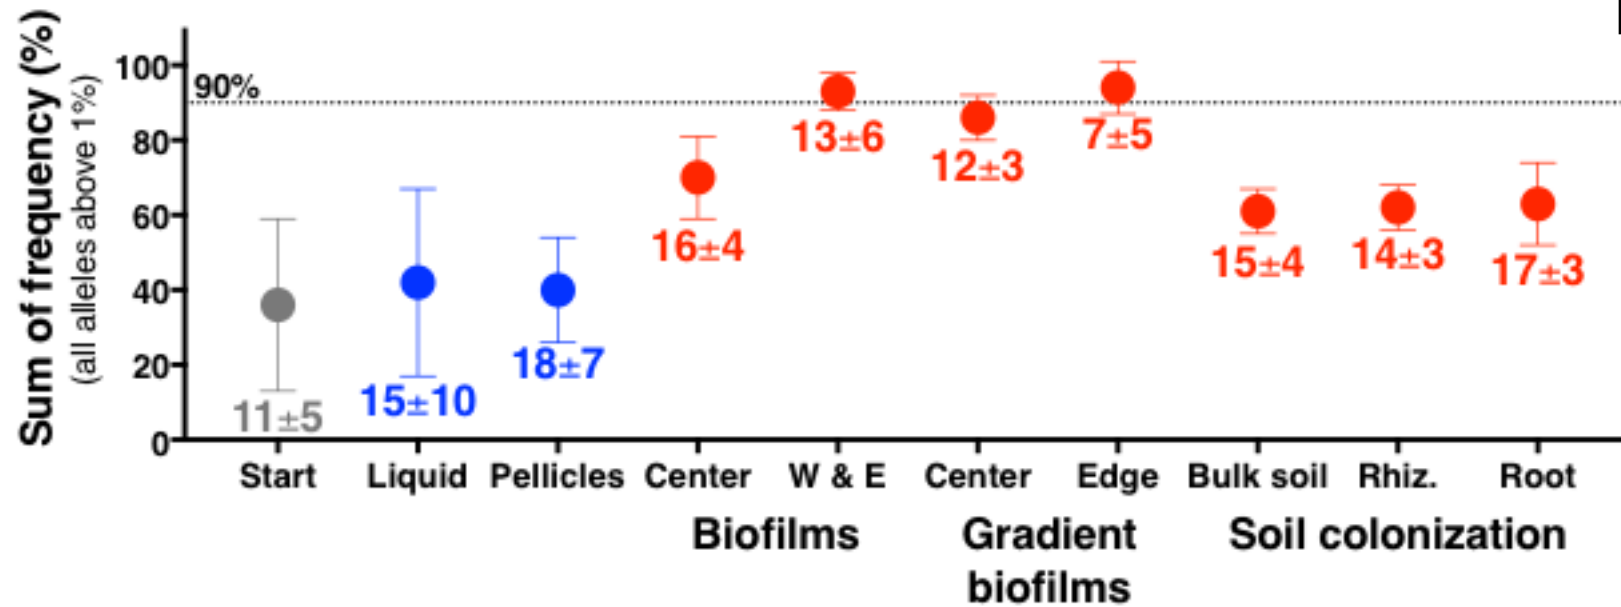**F**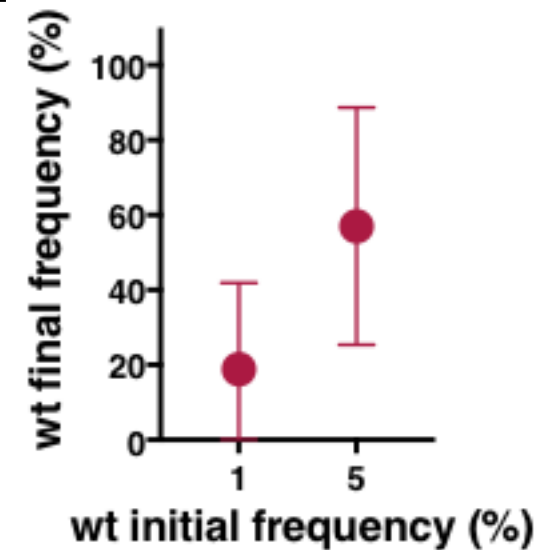

**A**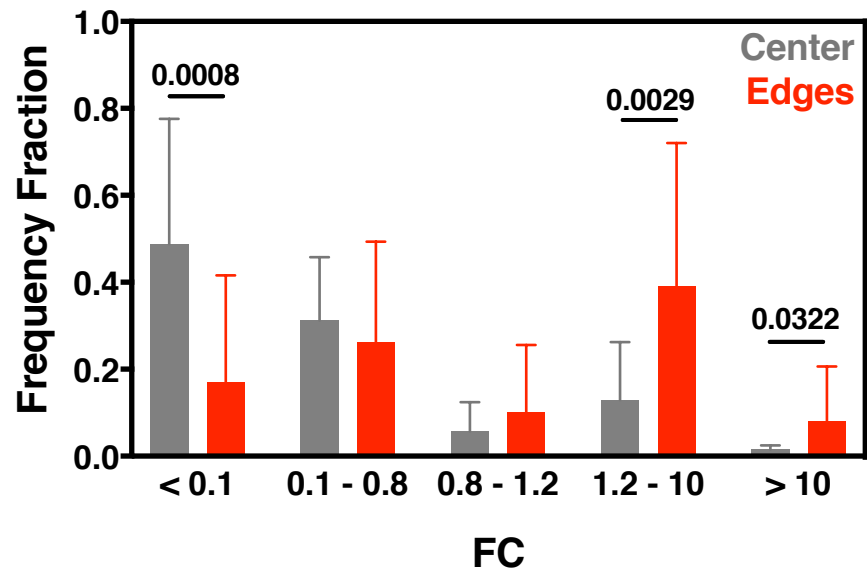**B**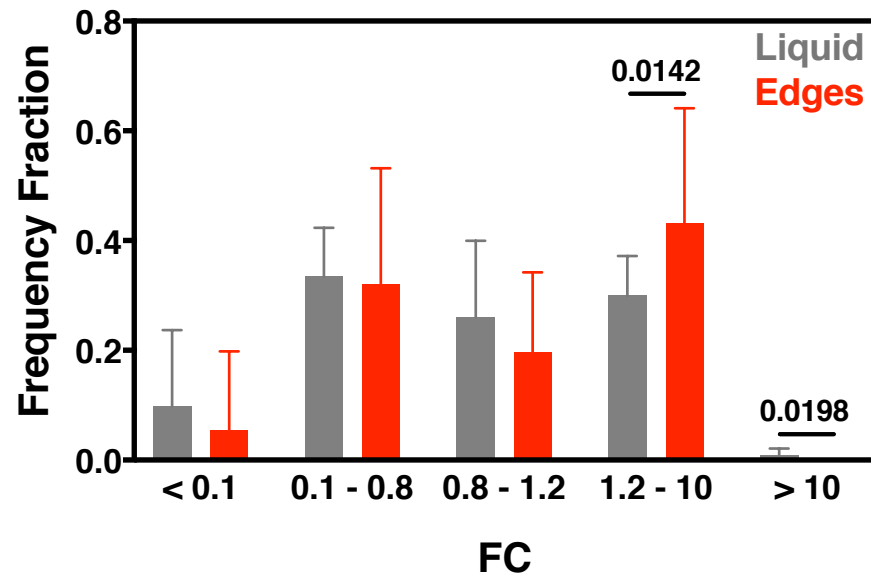**C**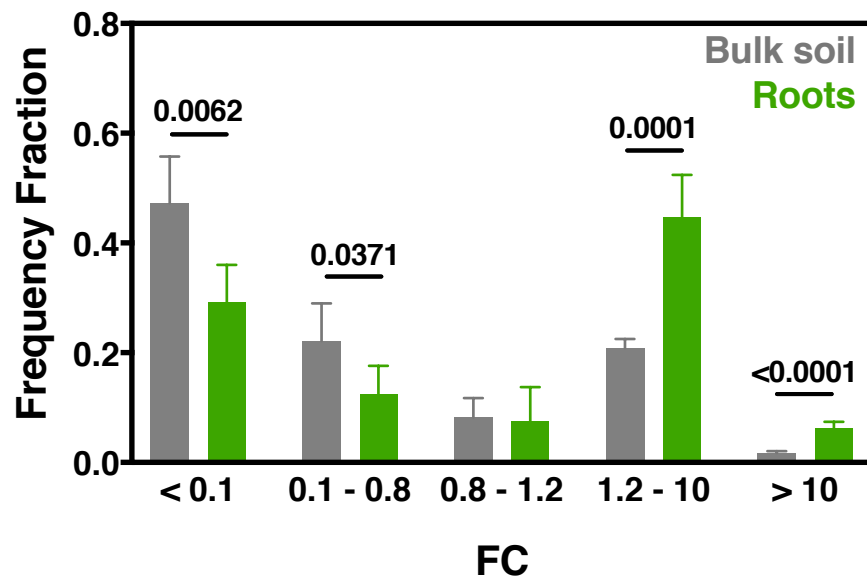**D**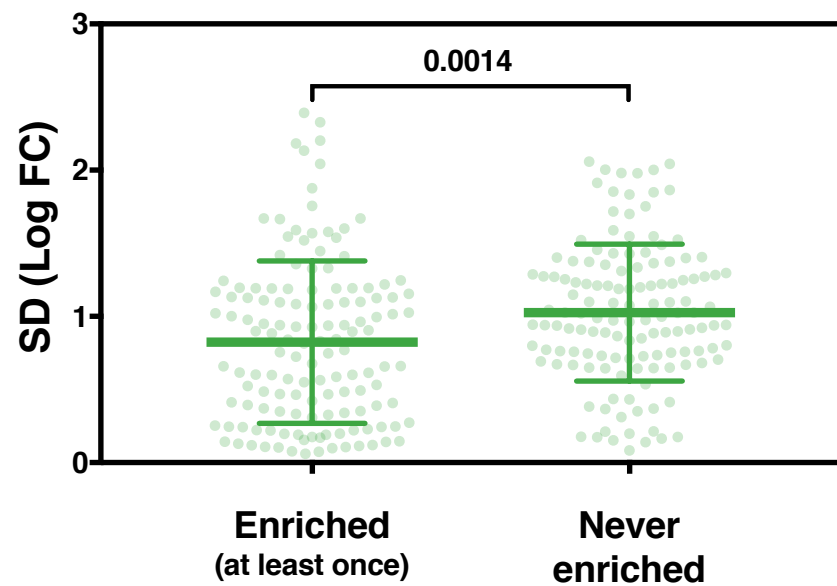

**A**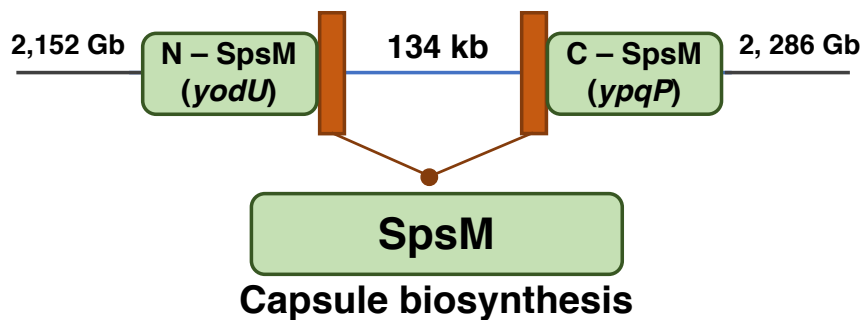**B**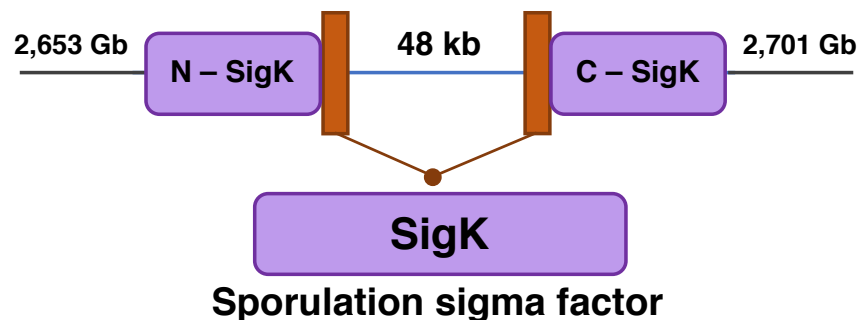**C**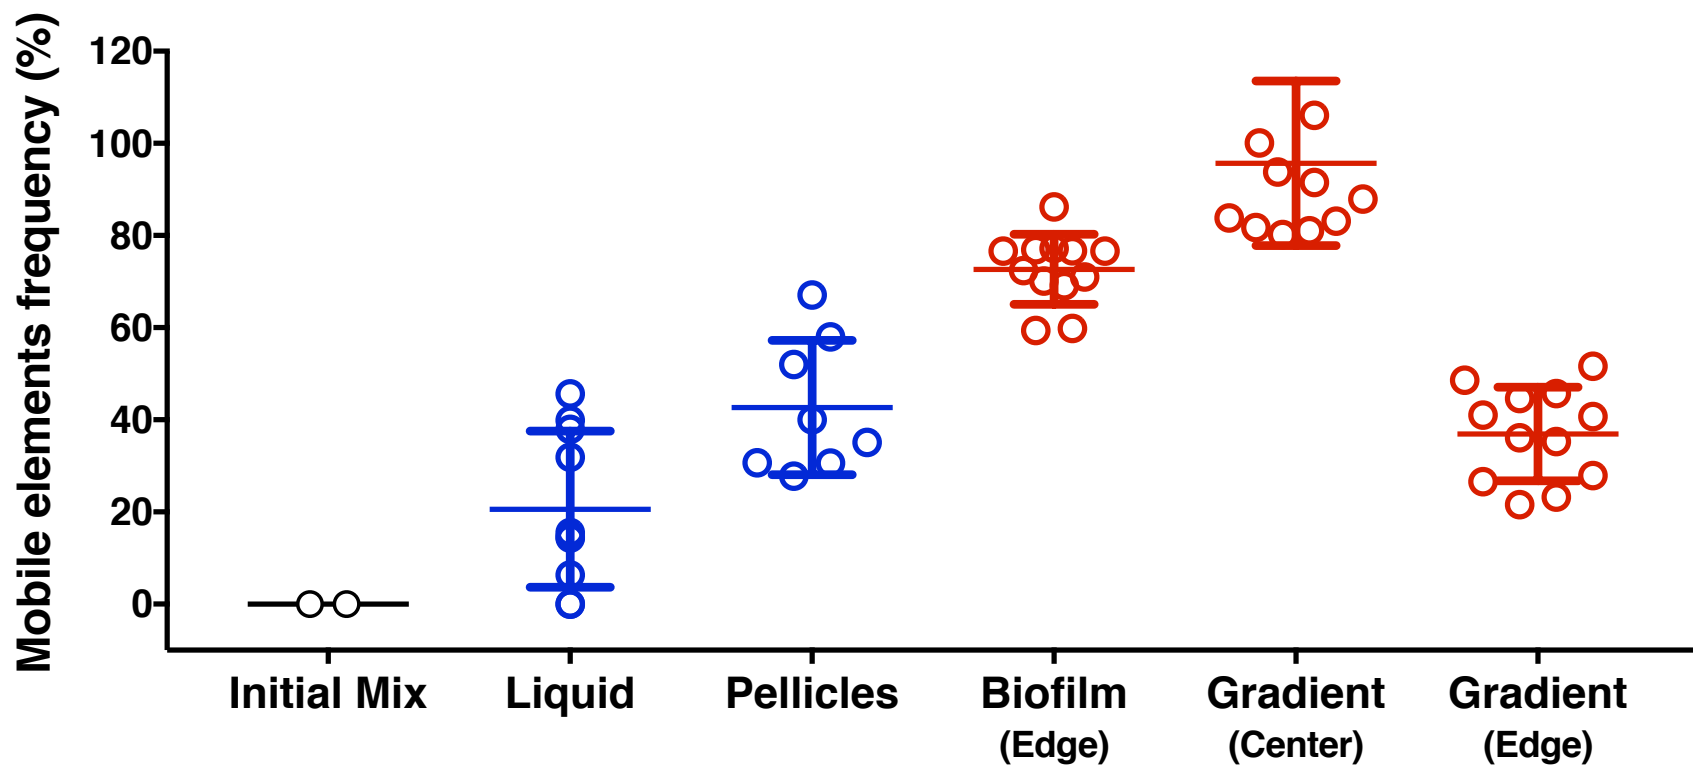

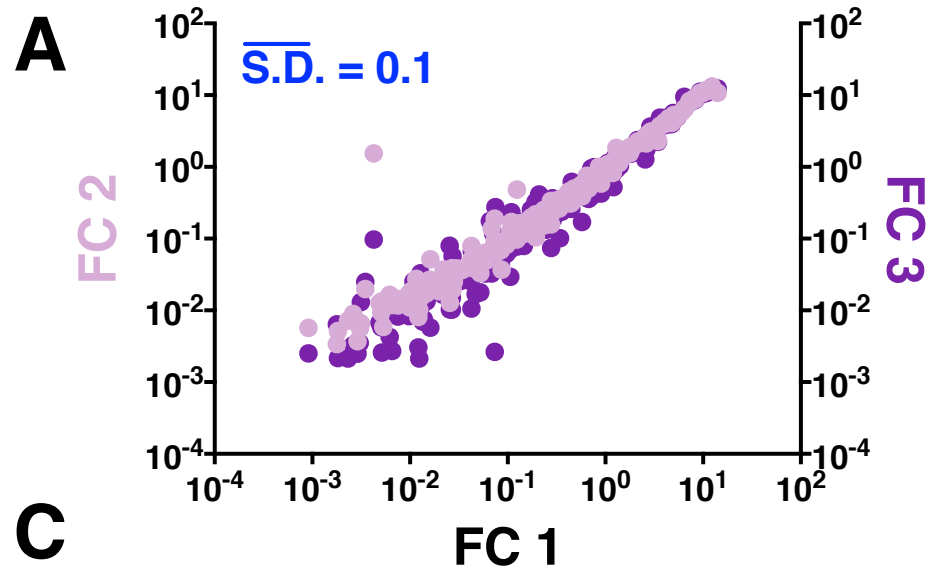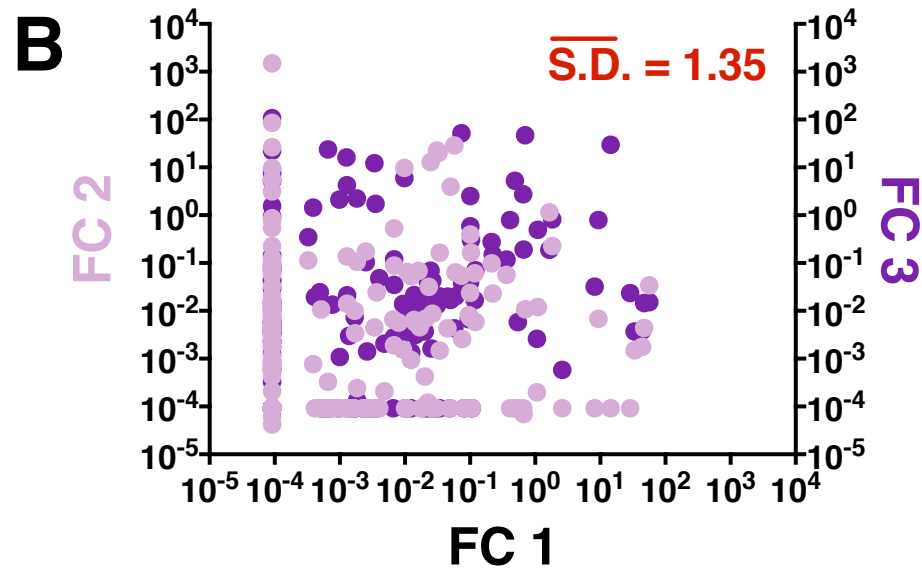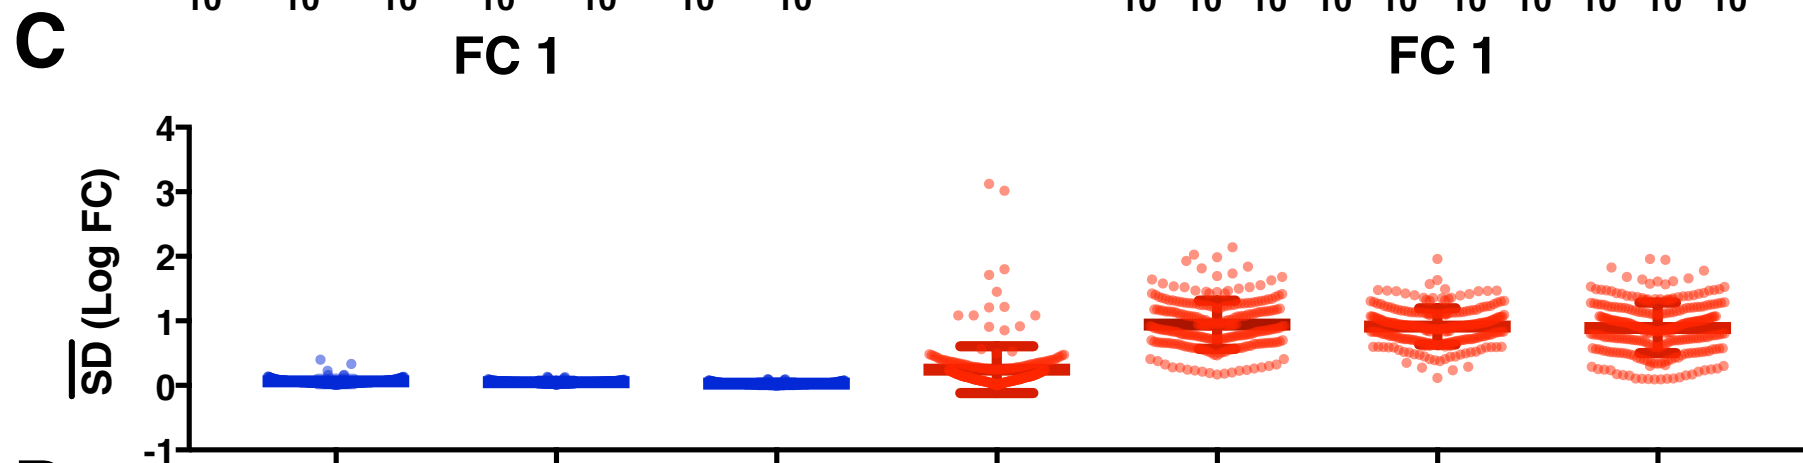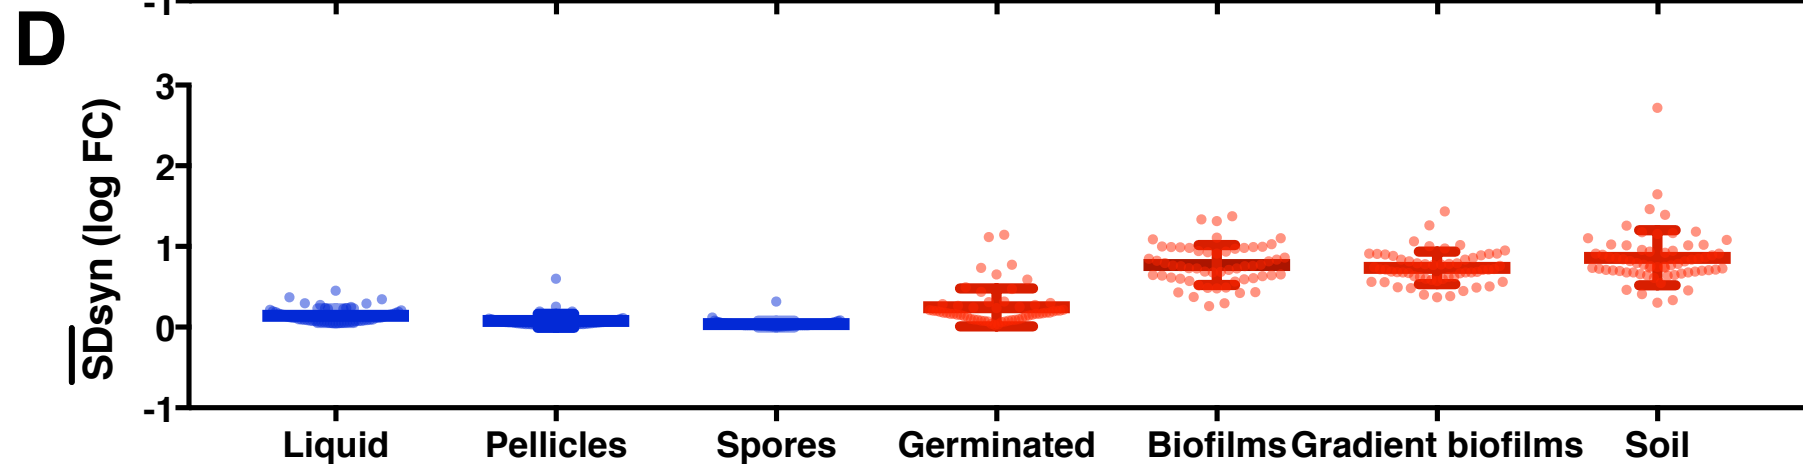

Source: https://www.biorxiv.org/content/10.1101/340828v2.full.pdf
